# Supplementary material for: Photodissociation of leucine-enkephalin protonated peptide: an experimental and theoretical perspective
Source: Royal Society of Chemistry journal article supplement (doi:10.1039/d4ra01690d), 2024-01-01
Supplement: d4ra01690d1.pdf [file d4ra01690d1.pdf]

## Photodissociation of Leucine-Enkephalin protonated peptide: an experimental and theoretical perspective.

Lara Martínez-Fernández,<sup>[1]</sup> Miloš Lj. Ranković,<sup>[2,3]</sup> Francis Canon,<sup>[4]</sup> Laurent Nahon,<sup>[4]</sup> Alexandre Giuliani,<sup>[4],[5]</sup> Aleksandar R. Milosavljević\*<sup>[4]</sup> and Ana Martin-Somer\*<sup>[6]</sup>

<sup>1</sup>Departamento de Química - Módulo 13 - Universidad Autónoma de Madrid -28049, Spain

<sup>2</sup>Institute of Physics Belgrade, University of Belgrade, Pregrevica 118, 11080 Belgrade, Serbia

<sup>3</sup>Present address: Institute of Physical Chemistry J. Š Heyrovsky, CAS, Dolejškova 3, 18223 Prague 8, Czech Republic

<sup>4</sup>SOLEIL, l'Orme des Merisiers, St Aubin, BP48, F-91192 Gif sur Yvette Cedex, France

<sup>5</sup>INRAE, UAR1008 Dpet. Transform, Rue de la Géraudière, BP 71627, F-44316 Nantes, France

<sup>6</sup>Departamento de Química Física Aplicada - Módulo 14 - Universidad Autónoma de Madrid - 28049, Spain

\*e-mail: [milosavljevic@synchrotron-soleil.fr](mailto:milosavljevic@synchrotron-soleil.fr); [ana.somer@uam.es](mailto:ana.somer@uam.es)

### SUPPORTING INFORMATION

**Figure S1:** Photofragment partial ion yields (PIY).

**S.1** Functional and basis set evaluation.

**S.2.** Explanation of the theoretical protocol used.

**S.3.** Franck-Condon states and  $S_1$  minima.

**Table S1:** Characteristics of the brightest excited states at Franck-Condon region.

**Table S2:** Structure and electronic densities at Franck-Condon region and  $S_1$  minima.

**S.4.** Spin-orbit coupling and  $T_1$  calculations.

## Photofragment Partial Ion Yields (PIY)

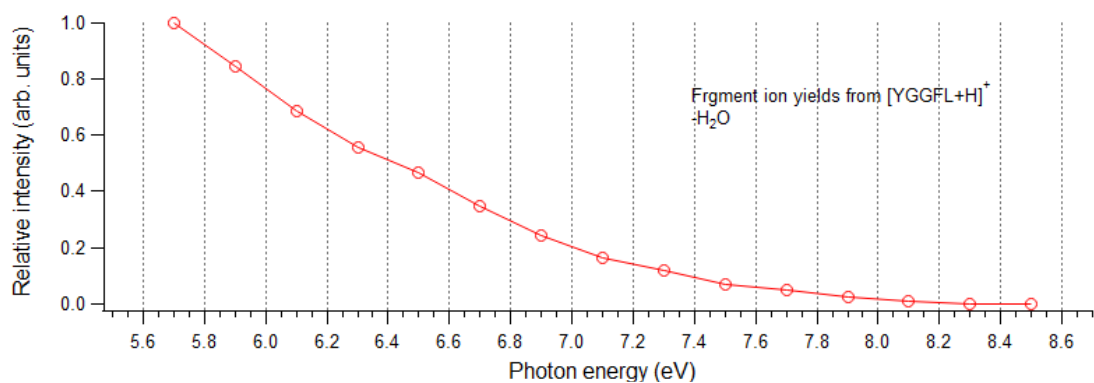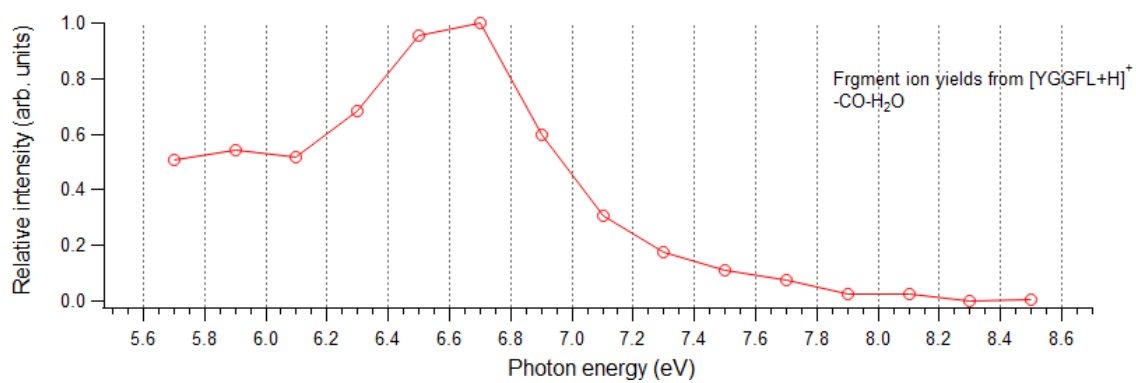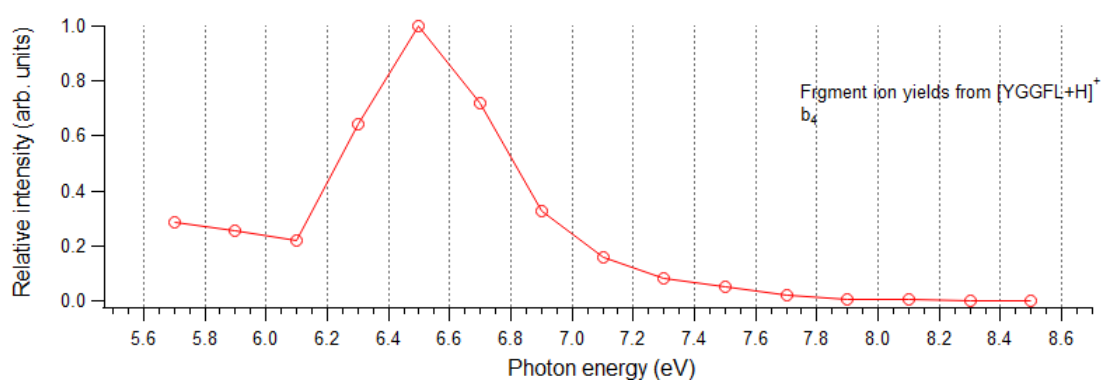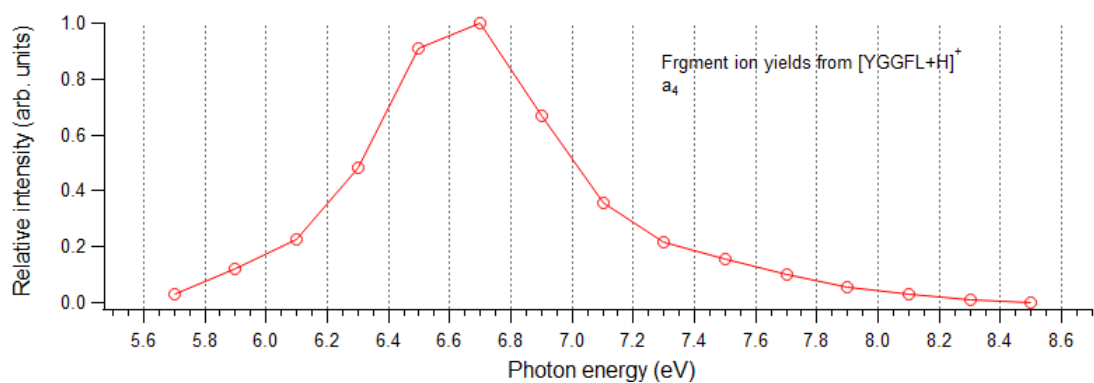

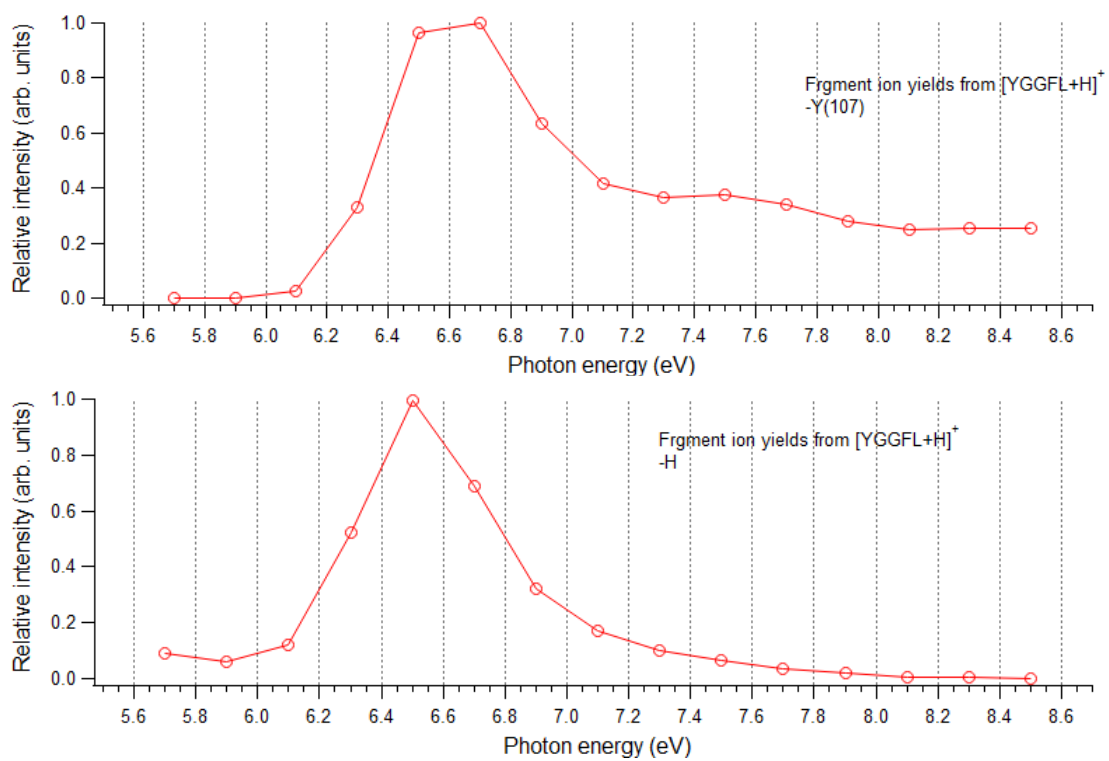

**Figure S1.** Selected experimental partial ion yields for protonated leucine-enkephalin peptide.

## S.1 Functional and basis set evaluation

We computed Leu-Enk-H<sup>+</sup> absorption spectrum with eight different functionals belonging to three different families (all in combination with cc-pVDZ basis set) for assessing their performance (Figure S1). For the experimental spectrum, we only have data in the 5.7-8.5 eV region. There is one band that appears at 6.7 eV. (See figure 3 of main text).

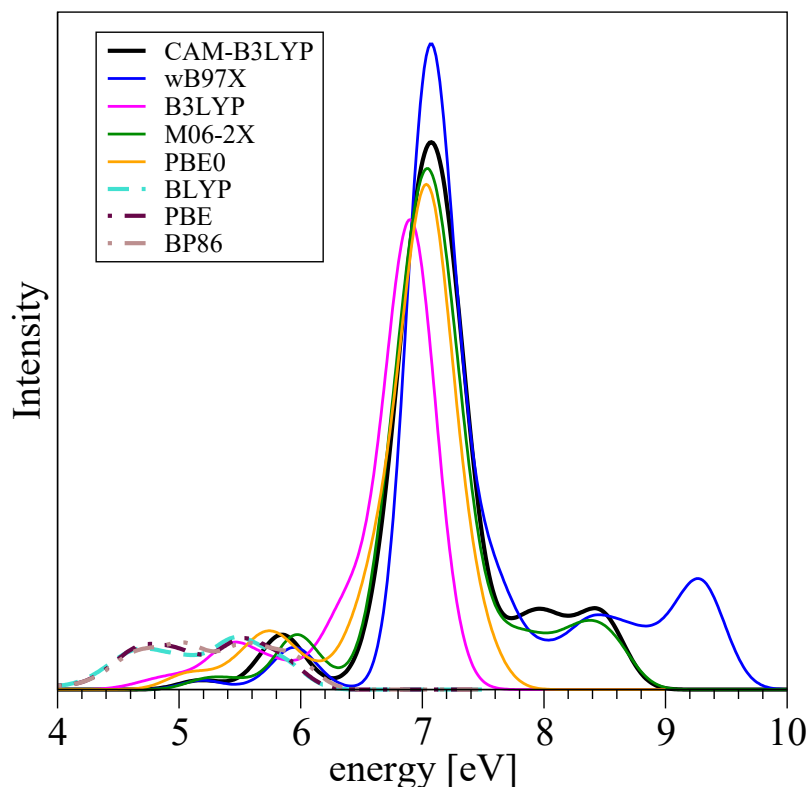

**Figure S2:** TD-DFT computed LeuEnkH<sup>+</sup> absorption spectra, with different functionals and cc-pVDZ basis set.

The group of LD/GGA (BP86, PBE/PBE and BLYP) clearly fail to reproduce the spectra. They all render a similar spectrum with two overlapping bands of similar intensity, centered around 4.7 eV and 5.5 eV.

The group of hybrid functionals (B3LYP, M06-2X, PBE0). B3LYP and PBE0 yield spectra very similar in shape, with a small band at 5.45 and 5.76 and a second, high intensity band at 6.90 and 7.00 eV. M06-2X shows these two bands also, slightly shifted to the blue (5.96 and 7.00) and a third one appearing at 8.41 eV.

Long-range corrected (LC) (CAM-B3LYP and wB97X) slightly differ in their shape. In particular in the high energy region. Both show a low intensity band at 5.85 and 5.95, respectively. A second band, the most intense one, centered at 7 eV in both bases. Cam-b3lyp displays two overlapping bands of low intensity at 7.94 and 8.44 eV while for wB972X this two bands are displaced to the blue, appearing at 8.44 and 9.29 eV, with the second slightly higher in intensity.

All the computed spectra appear shifted to the blue compared to the experimental. There is not a clear choice comparing to the experimental data, all hybrid and long-range corrected show a main band as the experimental one. Long-range corrected functionals are better suited charge transfer excitations, that might be relevant in our study. Between the two LC tested, we chose cam-B3LYP since it is faster and has shown good performance in treating such kind of extended pi systems.

### Basis set

Once the functional is chosen, we tested different basis set using CAM-B3LYP, Figure S2.

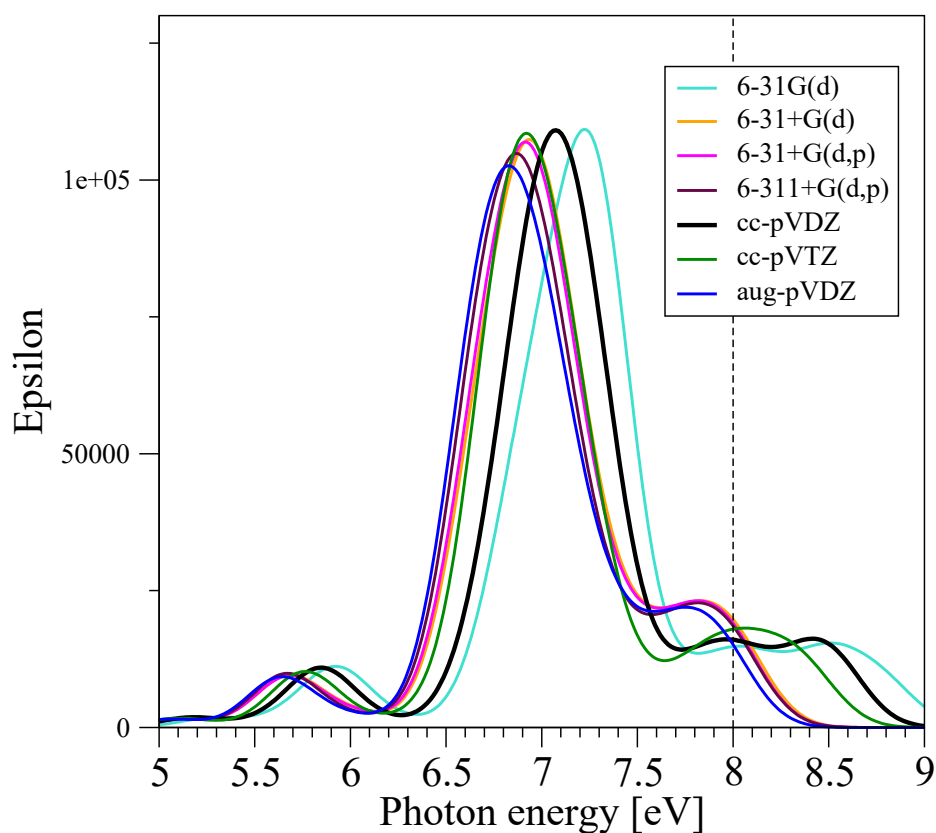

**Figure S3:** TD-DFT computed LeuEnkH<sup>+</sup> absorption spectra, with CAM-B3LYP and different basis sets.

The increase of the basis set causes a red shift of the spectra, as well as the inclusion of diffuse functions. We chose cc-pVDZ basis set as a good compromise between accuracy and computational cost.

## S.2. Explanation of the theoretical protocol used.

1. The Franck-Condon (FC) principle is based upon the fact that electronic transitions occur vertically in potential energy diagrams. This means that when going from the ground state (GS) to the excited state (ES), the electrons will move much more quickly than the nuclei. Therefore, right after the molecule absorbs the photon, the nuclei will remain in the same place, but the electronic distributions might be different. Therefore, after the vertical transition the molecule is in a non-equilibrium geometry of the SX excited state. So, once the molecule has absorbed the photon and the electrons redistributed themselves, the nuclei will in turn evolve to their new equilibrium positions, the nuclear coordinates will change adopting a new equilibrium geometry.

In other words, the FC region is the region around which the molecule oscillates when it absorbs light. Thus, when we refer to the FC region, we mean the region of the PES defined by the ground state minimum of the molecule.

2. The oscillator strength ( $f$ ) is a quantity that expresses the probability of absorption (or emission) of electromagnetic radiation between two energy levels. It is proportional to the transition dipole moment. The larger  $f$  is for a given transition, the greater the probability of that transition happening, and therefore the probability of the final state (excited state) becoming populated. Transitions with large oscillator strengths are called bright transitions. On the contrary, transitions with  $f = 0$  (or very low) are not allowed (or have a very low probability) and are called dark transitions.

We used  $f$  as a guide to select which states are preferentially populated after light absorption and most probable to initiate a photochemical pathway.

So, the standard procedure is to consider the lowest brightest singlet states in the FC region and then characterize their potential energy surface. For completeness, sometimes the same is done with the dark states, but we would like to emphasize that only considering the birth ones means in our case to optimize 22 states. We also consider that if a dark state presents a very stable minimum, it could be reached from our calculations.

### S.3. Franck-Condon states and $S_1$ minima

**Table S1:** Characteristics of the brightest excited states ( $f > 0.05$ ) up to 8 eV and the  $S_1$  minimum they reach upon optimization. For comparison, all the states below  $S_6$  are included independently of their  $f$ .

| Franck-Condon |         |               |               | Optimized minima |                |               |        |
|---------------|---------|---------------|---------------|------------------|----------------|---------------|--------|
| Excited State | Familiy | Vertical [eV] | f=            | Family           | Adiabatic [eV] | Vertical [eV] | f=     |
| $S_1$         | F1      | 5.17          | 0.0267        | min3-PB1         | 4.80           | 3.75          | 0.0005 |
| $S_2$         | F2      | 5.48          | 0.0008        | min7-phenol      | 4.99           | 4.82          | 0.0337 |
| $S_3$         | PB1     | 5.54          | 0.0054        | min3-PB1         | 4.80           | 3.75          | 0.0005 |
| $S_4$         | PB2     | 5.62          | 0.0106        | min5-PB4         | 4.88           | 3.67          | 0.0011 |
| $S_5$         | PB4     | 5.76          | 0.0099        | min3-PB1         | 4.80           | 3.75          | 0.0005 |
| $S_6$         | COOH    | 5.80          | 0.0315        | min1-HT          | 3.69           | 0.99          | 0.0001 |
| $S_7$         | F1      | 5.87          | <b>0.1142</b> | min3-PB1         | 4.80           | 3.75          | 0.0005 |
| $S_{14}$      | F3      | 6.76          | 0.0784        | min1-HT          | 3.69           | 0.99          | 0.0001 |
| $S_{16}$      | F3      | 6.87          | <b>0.4199</b> | min1-HT          | 3.69           | 0.99          | 0.0001 |
| $S_{17}$      | F4      | 6.94          | 0.0823        | min2-HT          | 4.32           | 2.19          | 0.0003 |
| $S_{18}$      | F4      | 6.97          | 0.069         | min8-phenyl      | 5.33           | 5.19          | 0.012  |
| $S_{19}$      | F4      | 6.97          | <b>0.1033</b> | min1-HT          | 3.69           | 0.99          | 0.0001 |
| $S_{20}$      | F5      | 7.03          | <b>0.1388</b> | min1-HT          | 3.69           | 0.99          | 0.0001 |
| $S_{21}$      | F5      | 7.06          | <b>0.3066</b> | min1-HT          | 3.69           | 0.99          | 0.0001 |
| $S_{22}$      | F6      | 7.10          | <b>0.1575</b> | min5-PB4         | 4.88           | 3.67          | 0.0011 |
| $S_{23}$      | F6      | 7.11          | <b>0.1969</b> | min5-PB4         | 4.88           | 3.67          | 0.0011 |
| $S_{25}$      | F3      | 7.17          | 0.0563        | min7-phenol      | 4.99           | 4.82          | 0.0337 |
| $S_{27}$      | F3      | 7.24          | <b>0.1467</b> | min6-phenol      | 4.95           | 1.00          | 0.0000 |
| $S_{28}$      | F3      | 7.26          | <b>0.3207</b> | min5-PB4         | 4.88           | 3.67          | 0.0011 |
| $S_{29}$      | F4      | 7.28          | 0.0717        | min4-PB1         | 4.84           | 3.75          | 0.0017 |
| $S_{30}$      | F3      | 7.35          | 0.0743        | min8-phenyl      | 5.33           | 5.19          | 0.0012 |

**Table S2:** Electronic densities for the brightest excited states ( $f > 0.05$ ) at the Franck-Condon region for [YGGFL+H]<sup>+</sup>. They are grouped based on the minimum reached after optimization of the FC excited state, shown in the last column (geometry and electronic density difference for the S<sub>1</sub> minima, and relative energies). Note, that the last minima is at the S<sub>2</sub> excited state surface.

| FC region                                                                                                              |                                                                                                            |                                                                                                             | Optimized S <sub>1</sub> minima                                                                                           |
|------------------------------------------------------------------------------------------------------------------------|------------------------------------------------------------------------------------------------------------|-------------------------------------------------------------------------------------------------------------|---------------------------------------------------------------------------------------------------------------------------|
| 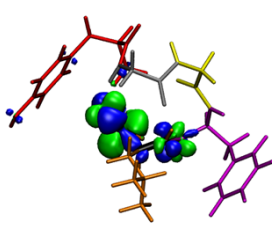<br>S <sub>6</sub> -CO <sub>2</sub> H | <br>S <sub>14</sub> -F3   | <br>S <sub>16</sub> -F3   | <br><b>Min1-HT</b><br><b>0.00eV</b>    |
| <br>S <sub>19</sub> -F4              | <br>S <sub>20</sub> -F5  | <br>S <sub>21</sub> -F5  |                                                                                                                           |
| <br>S <sub>17</sub> -F4             |                                                                                                            |                                                                                                             |                                                                                                                           |
| <br>S <sub>1</sub> -F1              | <br>S <sub>3</sub> -PB1 | <br>S <sub>5</sub> -PB4 | <br><b>Min3-PB1</b><br><b>1.11eV</b> |
| <br>S <sub>7</sub> -F1              |                                                                                                            |                                                                                                             |                                                                                                                           |



| FC region                                                                                                                   |                                                                                                                             |                                                                                                                            | Optimized S <sub>1</sub> minima                                                                                                                   |
|-----------------------------------------------------------------------------------------------------------------------------|-----------------------------------------------------------------------------------------------------------------------------|----------------------------------------------------------------------------------------------------------------------------|---------------------------------------------------------------------------------------------------------------------------------------------------|
| <div>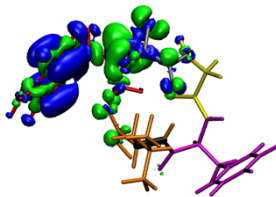</div> <div>S<sub>29</sub>-F4</div>   |                                                                                                                             |                                                                                                                            | <div></div> <div>Min4-PB1<br/>1.15eV</div>                     |
| <div></div> <div>S<sub>4</sub>-PB2</div>   | <div></div> <div>S<sub>22</sub>-F6</div>   | <div></div> <div>S<sub>23</sub>-F6</div> | <div></div> <div>Min5-PB4<br/>1.19eV</div>                     |
| <div></div> <div>S<sub>28</sub>-F3</div>  |                                                                                                                             |                                                                                                                            |                                                                                                                                                   |
| <div></div> <div>S<sub>27</sub>-F3</div> |                                                                                                                             |                                                                                                                            | <div></div> <div>Min6-phenol<br/>1.26eV</div>                |
| <div></div> <div>S<sub>2</sub>-F2</div>  | <div></div> <div>S<sub>25</sub>-F3</div> |                                                                                                                            | <div></div> <div>Min7-phenol<br/>1.30eV</div>                |
| FC region                                                                                                                   |                                                                                                                             |                                                                                                                            | Optimized S <sub>1</sub> minima                                                                                                                   |
| <div></div> <div>S<sub>18</sub>-F4</div> | <div></div> <div>S<sub>30</sub>-F3</div> |                                                                                                                            | <div></div> <div>Min8-phenyl<br/>1.65eV- S<sub>2</sub></div> |

#### S4. Spin-orbit coupling and T<sub>1</sub> calculations.

In tables S3 to S10 we reported the vertical energies and spin-orbit coupling (cm<sup>-1</sup>) terms computed at the TDA CAM-B3LYP/cc-pVDZ level of theory for the eight minima reported in the main text. Spin Orbit Coupling (SOC) terms have been estimated using the single particle Breit–Pauli operator with an effective charge approximation as implemented in the PySOC Code (ref 69). Highlighted in green are all the states below S<sub>1</sub> minimum and up to 0.5 eV over it.

**Table S3:** min1 SOC (cm<sup>-1</sup>) terms and vertical energies (eV).

| ee        | Vertical energy | SOC     |
|-----------|-----------------|---------|
| T1        | 0.9877          | 0.01842 |
| <b>S1</b> | <b>0.9945</b>   |         |
| T2        | 2.4455          | 0.5019  |

**Table S4:** min2 SOC (cm<sup>-1</sup>) terms and vertical energies (eV).

| Ee        | Vertical energy | SOC      |
|-----------|-----------------|----------|
| T1        | 2.0932          | 0.45257  |
| <b>S1</b> | <b>2.1859</b>   |          |
| T2        | 3.0578          | 8.23827  |
| T3        | 3.1776          | 1.71617  |
| T4        | 3.4816          | 10.01797 |

**Table S5:** min3 SOC (cm<sup>-1</sup>) terms and vertical energies (eV).

| ee        | Vertical energy | SOC      |
|-----------|-----------------|----------|
| T1        | 2.884           | 39.75559 |
| T2        | 3.1997          | 11.01356 |
| T3        | 3.516           | 0.80708  |
| T4        | 3.5549          | 0.00044  |
| <b>S1</b> | <b>3.7527</b>   |          |
| T5        | 4.1145          | 0.75858  |
| T6        | 4.5809          | 2.04187  |

**Table S6:** min4 SOC ( $\text{cm}^{-1}$ ) terms and vertical energies (eV).

| ee        | Vertical energy | SOC      |
|-----------|-----------------|----------|
| T1        | 2.9727          | 42.01945 |
| T2        | 3.1829          | 9.27501  |
| T3        | 3.5178          | 1.14948  |
| T4        | 3.5546          | 0.00194  |
| <b>S1</b> | <b>3.7551</b>   |          |
| T5        | 4.1572          | 0.32198  |
| T6        | 4.5626          | 1.1174   |

**Table S7:** min5 SOC ( $\text{cm}^{-1}$ ) terms and vertical energies (eV).

| Ee        | Vertical energy | SOC      |
|-----------|-----------------|----------|
| T1        | 3.0737          | 26.12196 |
| T2        | 3.2305          | 29.1501  |
| T3        | 3.5192          | 0.0144   |
| T4        | 3.5564          | 0.26525  |
| <b>S1</b> | <b>3.6715</b>   |          |
| T5        | 4.1447          | 0.00996  |
| T6        | 4.6064          | 0.01845  |

**Table S8:** min6 SOC ( $\text{cm}^{-1}$ ) terms and vertical energies (eV).

| min6      | Vertical energy | SOC      |
|-----------|-----------------|----------|
| S0        | 0               |          |
| T1        | -1.916          | 26.01919 |
| T2        | 0.6234          | 0.40502  |
| <b>S1</b> | <b>0.9991</b>   |          |
| T3        | 3.2498          | 2.16563  |
| S2        | 3.2982          |          |
| T4        | 3.3151          |          |

**Table S9:** min7 SOC (cm<sup>-1</sup>) terms and vertical energies (eV).

| ee        | Vertical energy | SOC     |
|-----------|-----------------|---------|
| T1        | 3.2437          | 1.27001 |
| T2        | 3.5539          | 0.00049 |
| T3        | 3.7292          | 0.10663 |
| T4        | 4.3667          | 0.0289  |
| T5        | 4.738           | 0.00164 |
| T6        | 4.7662          | 0.29641 |
| T7        | 4.7705          | 0.00481 |
| <b>S1</b> | <b>4.817</b>    |         |
| T8        | 5.0135          | 0.22231 |
| T9        | 5.0141          | 0.17335 |
| T10       | 5.0762          | 0.05137 |
| T11       | 5.106           | 0.0045  |
| T12       | 5.1702          | 0.34386 |
| T13       | 5.2068          | 0.13813 |
| T14       | 5.3035          | 1.03726 |
| T15       | 5.3133          | 0.1287  |
| T16       | 5.3844          | 0.23768 |

**Table S10:** min8 SOC (cm<sup>-1</sup>) terms and vertical energies (eV).

| ee        | Vertical energy | SOC     |
|-----------|-----------------|---------|
| T1        | 3.1226          | 1.35904 |
| T2        | 3.5215          | 0.00555 |
| T3        | 4.1473          | 0.00101 |
| T4        | 4.4538          | 0.02303 |
| T5        | 4.504           | 0.04925 |
| T6        | 4.6058          | 0.00075 |
| T7        | 4.7539          | 0.00737 |
| T8        | 4.8712          | 0.02136 |
| T9        | 4.9955          | 0.33421 |
| T10       | 5.0252          | 0.00563 |
| T11       | 5.082           | 0.0817  |
| S1        | 5.1569          |         |
| T12       | 5.1705          | 0.146   |
| <b>S2</b> | <b>5.1932</b>   |         |
| T13       | 5.2083          | 0.29296 |
| T14       | 5.3107          | 0.20427 |
| T15       | 5.3737          | 0.11249 |
| T16       | 5.3969          | 0.01355 |
| T17       | 5.5001          | 0.20258 |

**Table S11:** Relative energies after optimization in  $T_1$  surface of the  $S_1$  minima structure we high SOC. Energies are relative to the ground state starting minimum, min0. Optimization were performed at DFT CAM-B3LYP/cc-pVDZ level of theory.

| Starting Structure | Rel. Energy [eV] |
|--------------------|------------------|
| Min3               | 3.92             |
| Min3               | 3.94*            |
| Min4               | 4.08**           |
| Min5               | 4.20             |
| Min9-HT-PB4        | 3.85             |
| Min6               | 4.04             |

\*Optimization considering the first two excited singlets and triplets and using TDA.

\*\* Not converged

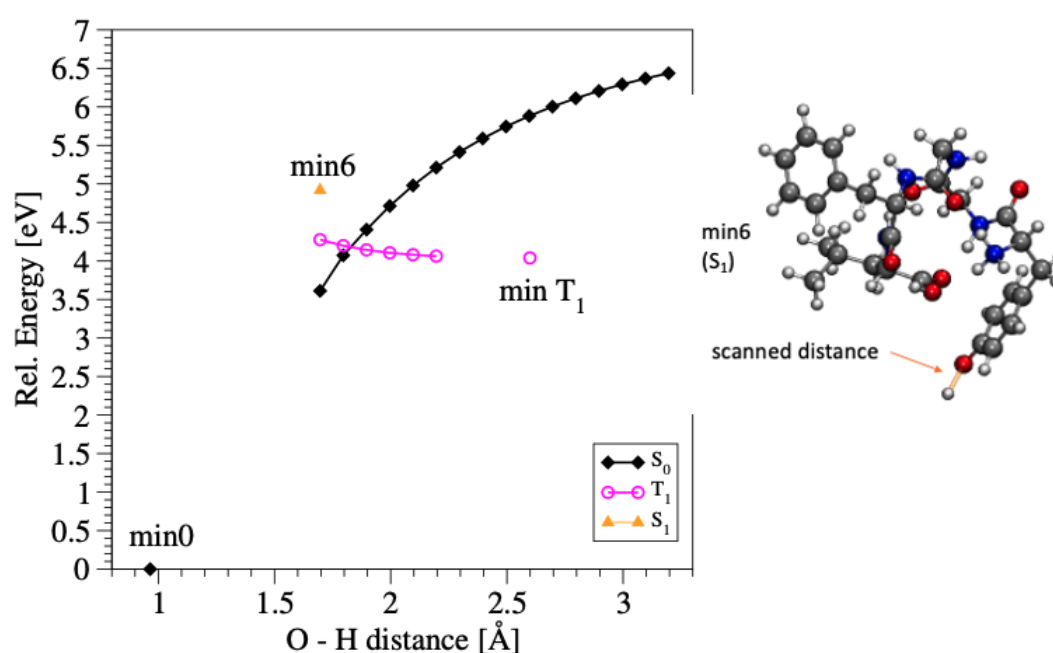

**Figure S4:** Scan of the phenol's hydroxyl O-H distance in the  $S_0$  and  $T_1$  PES to explain H loss mechanism.
